# Supplementary material
Source: publisher site journal article supplement (https://www.spandidos-publications.com/2378/downloadSupplementary)

Figure S1. OPNc knockdown modulates the mRNA expression of the OPNa and OPNb isoforms. Cisplatin-resistant ACRP ovarian cancer cells were transfected with ASO SCR or ASO anti-OPNc, and reverse transcription-quantitative PCR was used to analyze OPNa and OPNb mRNA expression levels. Log<sub>10</sub> relative expression levels were calculated using the 2<sup>-ΔΔC<sub>q</sub></sup> method and normalized to those of β-actin. ns, non-significant vs. ASO SCR. OPN, osteopontin; ASO, antisense oligonucleotide; SCR, scramble.

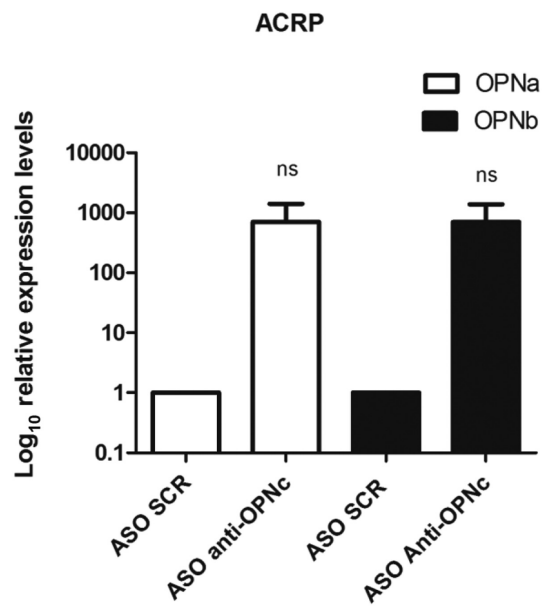

Figure S2. OPNc knockdown sensitizes OVCAR-8 Dox<sup>R</sup> cells to treatment and impairs cell viability. (A and B) OVCAR-8 Dox<sup>R</sup> ovarian cancer cells were transfected with ASO SCR or ASO anti-OPNc, and reverse transcription-quantitative PCR was used to analyze the mRNA expression levels of (A) OPNc and (B) P-gp. Relative expression levels were calculated using the  $2^{-\Delta\Delta C_q}$  method and normalized to those of  $\beta$ -actin. (C and D) Following 24-h transfection, OVCAR-8 Dox<sup>R</sup> cells were treated with increasing concentrations of doxorubicin for (C) 24 and (D) 96 h. Cell viability was measured by the MTT assay. \* $P \leq 0.05$ , \*\* $P \leq 0.01$  and \*\*\* $P \leq 0.001$ ; ns, non-significant. OPNc, osteopontin-c isoform; Dox<sup>R</sup>, doxorubicin-resistant; ASO, antisense oligonucleotide; SCR, scramble; P-gp, P-glycoprotein.

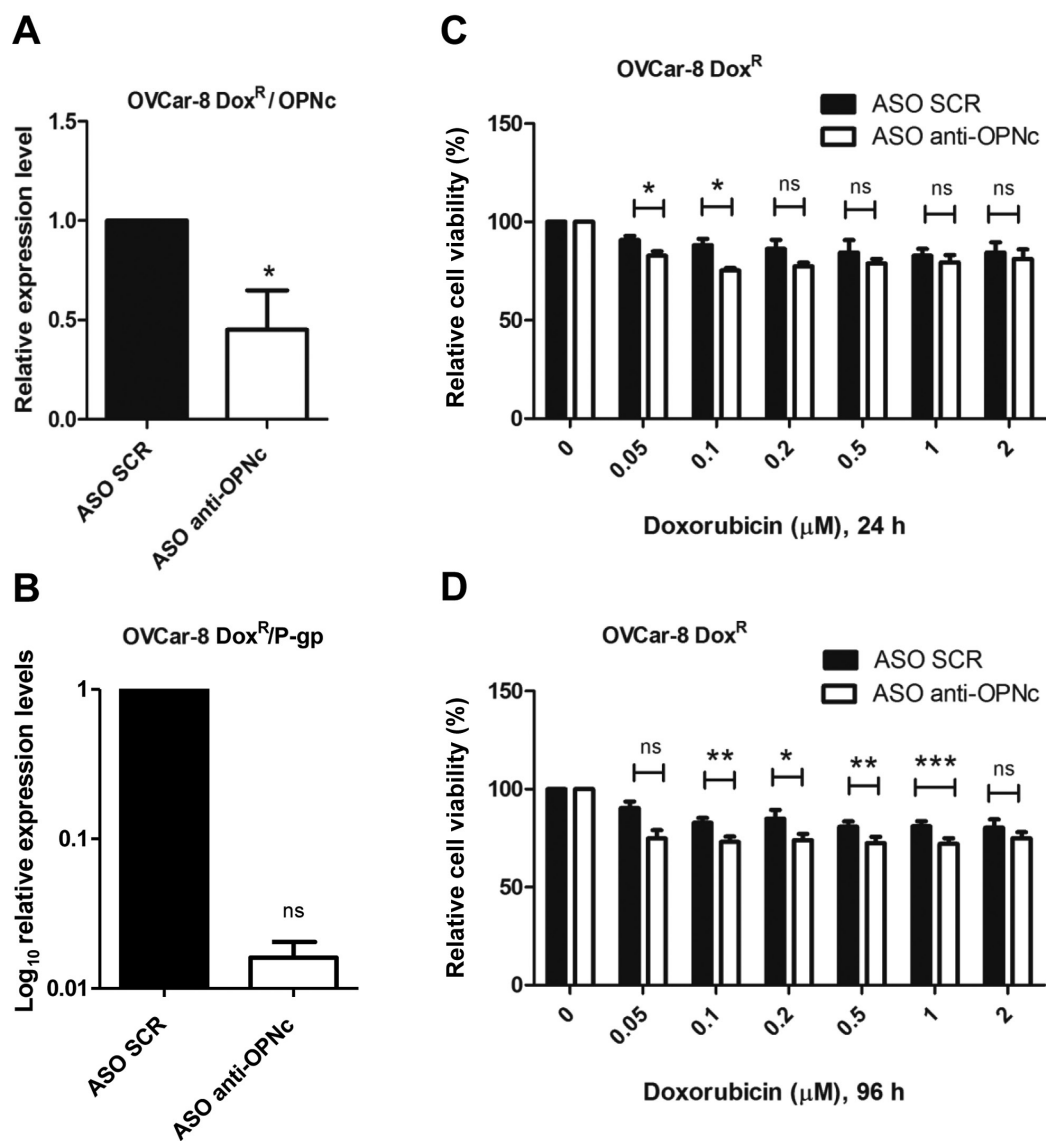

Figure S3. OPNc knockdown impairs the viability of OVCAR-8 Dox<sup>R</sup> cells. (A) OVCAR-8 Dox<sup>R</sup> ovarian cancer cells were transfected with ASO SCR or ASO anti-OPNc, and cell viability was determined using trypan blue exclusion assay. (B) Clone formation ability of OPNc-silenced OVCAR-8 Dox<sup>R</sup> cells was assessed after 14-day incubation by crystal violet staining. Optical density was obtained at 595 nm. \* $P \leq 0.05$ ; ns, non-significant. OPNc, osteopontin-c isoform; Dox<sup>R</sup>, doxorubicin-resistant; ASO, antisense oligonucleotide; SCR, scramble.

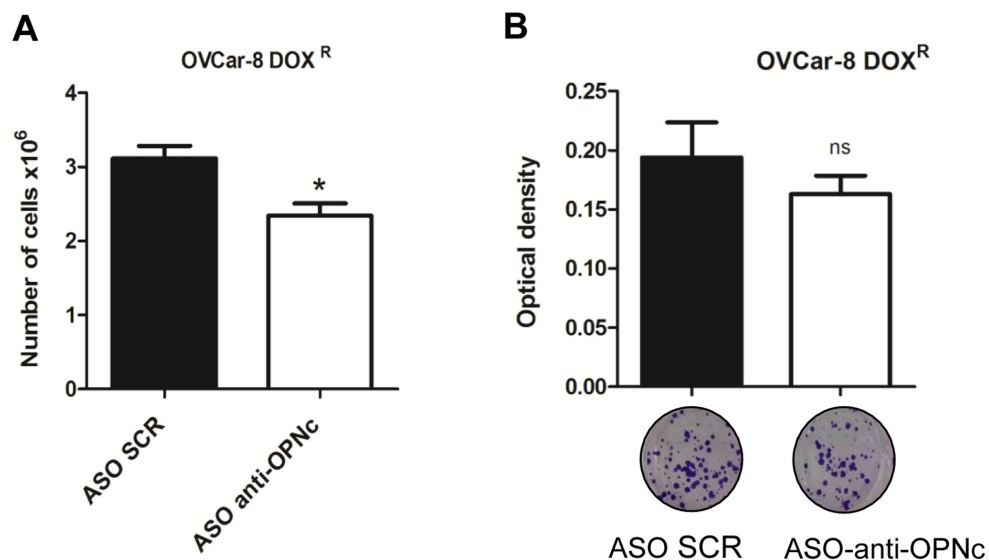

Figure S4. OPNc regulates the expression of epithelial-mesenchymal transition-related cytokines in doxorubicin-resistant cancer cells. OVCAR-8 Dox<sup>R</sup> cells were transfected with ASO SCR or ASO anti-OPNc, and the mRNA levels of IL-6, IL-8, IL-1 $\alpha$ , IL-1 $\beta$  and the GP130 receptor were analyzed by reverse transcription-quantitative PCR. The levels of mRNA were normalized those of  $\beta$ -actin. \* $P \leq 0.05$ , \*\* $P \leq 0.01$  and \*\*\* $P \leq 0.001$ ; ns, non-significant. OPNc, osteopontin-c isoform; Dox<sup>R</sup>, doxorubicin-resistant; ASO, antisense oligonucleotide; SCR, scramble; GP130, glycoprotein 130.

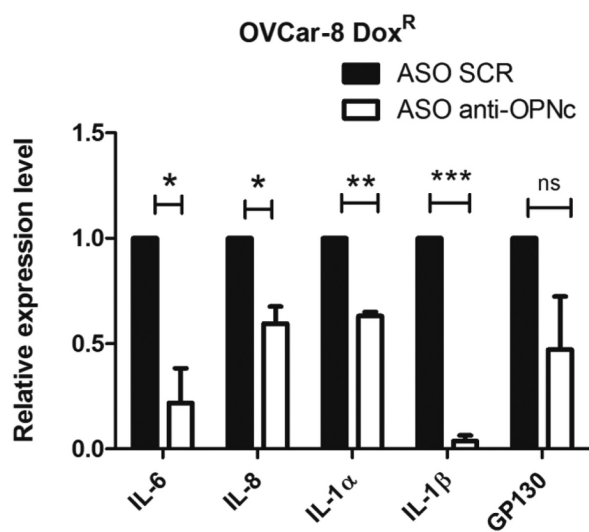

Figure S5. OPNc overexpressing cells exhibit attenuated chemosensitivity and OPNc modulation following 96-h cisplatin treatment. (A) A2780 OPNc<sup>+</sup> and pCR3.1-transfected cells were treated with increasing concentrations of cisplatin for 96 h, and cell viability was measured by the MTT assay. (B) A2780 OPNc<sup>+</sup> and pCR3.1-transfected were treated with 10  $\mu$ M cisplatin for 96 h, and OPNc expression levels were analyzed by reverse transcription-quantitative PCR. Log<sub>10</sub> relative expression levels were calculated using the  $2^{-\Delta\Delta C_q}$  method and normalized to those of  $\beta$ -actin. ns, non-significant. OPNc, osteopontin-c isoform; OPNc<sup>+</sup>, OPNc-overexpressing; pCR3.1, empty vector.

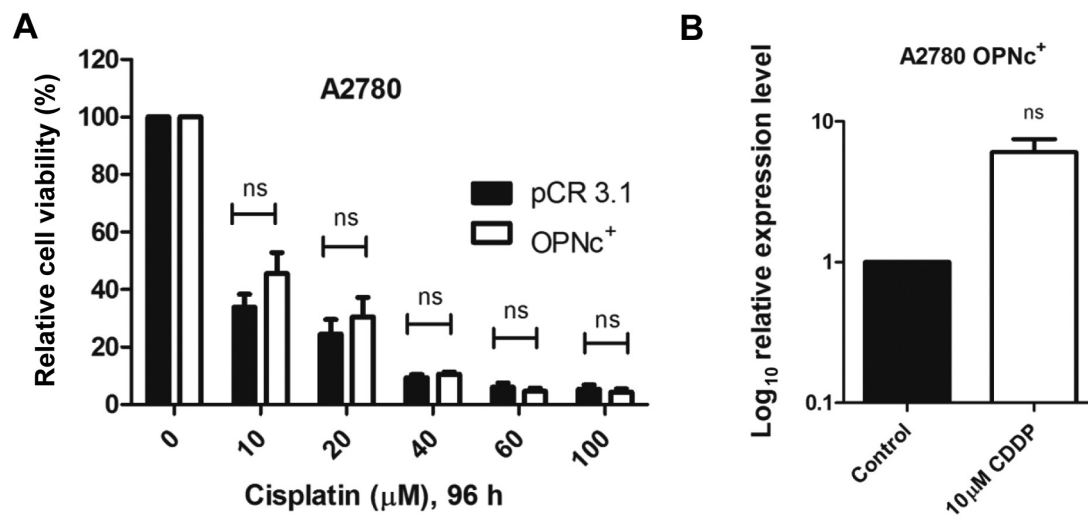

Supplement: Supplementary file 1 [file downloadSupplementary]
